# Supplementary material
Source: PubMed Central journal article supplement (PMC5522636)
Supplement: NIHMS859968-supplement.pdf [file NIHMS859968-supplement.pdf]

**Appendix**  
**Flavored Tobacco Product Use in Youth and Adults: Findings From the First Wave of the PATH Study (2013–2014)**  
**Villanti et al.**

**Appendix Table 1.** Current Product-specific Use and Current Flavored Use in the Full Sample by Age Group (12-17, 18-24, 25+); Population Assessment of Tobacco and Health, 2013-2014<sup>a</sup>

| Current tobacco use                                   | Youth<br>(unweighted N=13,651) <sup>b</sup><br>12-17 |                |              | Total        |                |              | Adult<br>(unweighted N=32,313; Missing=7) <sup>c</sup><br>18-24<br>(n=9,112) |                |              | 25+<br>(n=23,201) |                |              |
|-------------------------------------------------------|------------------------------------------------------|----------------|--------------|--------------|----------------|--------------|------------------------------------------------------------------------------|----------------|--------------|-------------------|----------------|--------------|
|                                                       | Unweighted<br>n                                      | % <sup>d</sup> | 95% CI       | Unweighted n | % <sup>d</sup> | 95% CI       | Unweighted n                                                                 | % <sup>d</sup> | 95% CI       | Unweighted n      | % <sup>d</sup> | 95% CI       |
| Any current tobacco use <sup>e</sup>                  | 1,152                                                | 8.5            | (8.0, 9.1)   | 14,391       | 23.0           | (22.4, 23.6) | 3,572                                                                        | 28.8           | (27.5, 30.2) | 10,819            | 22.1           | (21.5, 22.7) |
| Any flavored tobacco use                              | 919                                                  | 6.8            | (6.3, 7.3)   | 7,535        | 11.4           | (10.8, 11.9) | 2,598                                                                        | 20.9           | (19.4, 22.5) | 4,937             | 9.9            | (9.4, 10.5)  |
| Flavored use/Current use                              |                                                      | 79.8           | (77.2, 82.2) |              | 39.5           | (38.0, 40.9) |                                                                              | 72.7           | (70.8, 74.5) |                   | 44.8           | (43.6, 46.1) |
| Exclusive cigarette use <sup>f</sup>                  | 265                                                  | 2.0            | (1.7, 2.2)   | 8,679        | 14.2           | (13.7, 14.7) | 1,488                                                                        | 11.7           | (11.0, 12.6) | 7,191             | 14.6           | (14.0, 15.1) |
| Mentholated cigarettes                                | 149                                                  | 1.1            | (0.9, 1.3)   | 3,624        | 5.6            | (5.2, 6.0)   | 892                                                                          | 6.9            | (6.1, 7.8)   | 2,732             | 5.4            | (5.0, 5.8)   |
| Flavored use/Current use                              |                                                      | 56.5           | (50.4, 62.4) |              | 39.5           | (38.0, 40.9) |                                                                              | 59.0           | (56.0, 61.9) |                   | 37.1           | (35.6, 38.7) |
| Exclusive non-cigarette tobacco use <sup>g</sup>      | 515                                                  | 3.9            | (3.5, 4.4)   | 2,980        | 4.8            | (4.5, 5.0)   | 1,093                                                                        | 9.1            | (8.4, 9.9)   | 1,887             | 4.1            | (3.9, 4.3)   |
| Any flavored tobacco use                              | 424                                                  | 3.2            | (2.8, 3.6)   | 1,849        | 2.8            | (2.6, 3.0)   | 845                                                                          | 7.1            | (6.3, 8.0)   | 1,004             | 2.1            | (1.9, 2.4)   |
| Flavored use/Current use                              |                                                      | 82.6           | (78.9, 85.8) |              | 58.7           | (56.2, 61.1) |                                                                              | 77.8           | (75.1, 80.2) |                   | 52.3           | (49.4, 55.3) |
| Poly use of cigarettes and other tobacco <sup>h</sup> | 369                                                  | 2.6            | (2.4, 2.9)   | 2,722        | 4.0            | (3.8, 4.2)   | 989                                                                          | 7.9            | (7.3, 8.6)   | 1,733             | 3.4            | (3.2, 3.6)   |
| Any flavored tobacco use                              | 345                                                  | 2.5            | (2.2, 2.7)   | 2,058        | 2.9            | (2.7, 3.2)   | 859                                                                          | 6.9            | (6.1, 7.7)   | 1,199             | 2.3            | (2.1, 2.6)   |
| Flavored use/Current use                              |                                                      | 93.4           | (90.0, 95.7) |              | 73.6           | (71.2, 75.8) |                                                                              | 87.0           | (84.3, 89.3) |                   | 68.9           | (66.1, 71.6) |
| Cigarettes <sup>i</sup>                               | 634                                                  | 4.6            | (4.2, 5.0)   | 11,401       | 18.2           | (17.7, 18.7) | 2,477                                                                        | 19.6           | (18.4, 20.8) | 8,924             | 18.0           | (17.4, 18.5) |
| Mentholated cigarettes <sup>i</sup>                   | 383                                                  | 2.7            | (2.4, 3.1)   | 4,454        | 6.8            | (6.3, 7.2)   | 1,201                                                                        | 9.2            | (8.1, 10.3)  | 3,253             | 6.4            | (6.0, 6.8)   |
| Flavored use/Current use                              |                                                      | 59.5           | (55.0, 63.9) |              | 37.1           | (35.8, 38.5) |                                                                              | 46.8           | (44.1, 49.6) |                   | 35.6           | (34.2, 37.0) |
| E-cigarettes                                          | 418                                                  | 3.1            | (2.8, 3.5)   | 1,575        | 2.4            | (2.2, 2.6)   | 467                                                                          | 3.8            | (3.4, 4.3)   | 1,108             | 2.2            | (2.0, 2.4)   |
| Flavored e-cigarettes                                 | 354                                                  | 2.7            | (2.3, 3.0)   | 1,094        | 1.6            | (1.4, 1.8)   | 389                                                                          | 3.2            | (2.7, 3.7)   | 705               | 1.4            | (1.2, 1.6)   |
| Flavored use/Current use                              |                                                      | 85.3           | (80.7, 89.0) |              | 67.4           | (64.4, 70.2) |                                                                              | 83.4           | (79.2, 86.9) |                   | 63.2           | (60.0, 66.3) |
| Any cigar <sup>j</sup>                                | 340                                                  | 2.5            | (2.2, 2.8)   | 2,064        | 3.1            | (2.9, 3.2)   | 778                                                                          | 6.0            | (5.5, 6.6)   | 1,286             | 2.6            | (2.5, 2.8)   |
| Any flavored cigars                                   | 245                                                  | 1.8            | (1.5, 2.0)   | 1,144        | 1.6            | (1.4, 1.8)   | 508                                                                          | 3.9            | (3.3, 4.6)   | 636               | 1.2            | (1.1, 1.4)   |
| Flavored use/Current use                              |                                                      | 71.7           | (65.6, 77.1) |              | 52.0           | (49.6, 54.3) |                                                                              | 65.1           | (61.0, 69.0) |                   | 47.8           | (44.6, 50.4) |
| Traditional cigars <sup>j</sup>                       | 92                                                   | 0.7            | (0.6, 0.9)   | 890          | 1.5            | (1.4, 1.6)   | 258                                                                          | 2.2            | (1.9, 2.5)   | 632               | 1.3            | (1.2, 1.5)   |
| Flavored traditional cigars                           | -                                                    | -              | -            | 329          | 0.5            | (0.4, 0.6)   | 121                                                                          | 1.0            | (0.7, 1.3)   | 208               | 0.4            | (0.3, 0.5)   |
| Flavored use/Current use                              |                                                      |                |              |              | 33.3           | (29.8, 37.0) |                                                                              | 44.3           | (35.9, 53.1) |                   | 30.6           | (27.0, 34.5) |
| Cigarillos <sup>j</sup>                               | 293                                                  | 2.1            | (1.9, 2.4)   | 1,186        | 1.6            | (1.5, 1.7)   | 586                                                                          | 4.4            | (4.0, 4.9)   | 600               | 1.2            | (1.1, 1.3)   |
| Flavored cigarillos                                   | 217                                                  | 1.6            | (1.3, 1.8)   | 750          | 1.0            | (0.8, 1.1)   | 393                                                                          | 3.0            | (2.5, 3.5)   | 357               | 0.7            | (0.5, 0.8)   |
| Flavored use/Current use                              |                                                      | 74.1           | (68.0, 79.5) |              | 61.0           | (57.5, 64.4) |                                                                              | 68.0           | (63.0, 72.7) |                   | 57.1           | (52.1, 62.0) |
| Filtered cigars <sup>j</sup>                          | 67                                                   | 0.5            | (0.4, 0.6)   | 551          | 0.9            | (0.8, 0.9)   | 146                                                                          | 1.2            | (0.9, 1.5)   | 405               | 0.8            | (0.7, 0.9)   |
| Flavored filtered cigars                              | -                                                    | -              | -            | 341          | 0.5            | (0.4, 0.6)   | 114                                                                          | 1.0            | (0.6, 1.3)   | 227               | 0.4            | (0.4, 0.5)   |
| Flavored use/Current use                              |                                                      |                |              |              | 60.4           | (56.2, 64.4) |                                                                              | 79.3           | (68.6, 87.0) |                   | 56.2           | (51.7, 60.6) |
| Pipe tobacco                                          | -                                                    | -              | -            | 318          | 0.5            | (0.4, 0.6)   | 101                                                                          | 0.8            | (0.7, 1.0)   | 217               | 0.4            | (0.4, 0.5)   |
| Flavored pipe tobacco                                 | -                                                    | -              | -            | 119          | 0.2            | (0.1, 0.2)   | 40                                                                           | 0.3            | (0.2, 0.5)   | 79                | 0.1            | (0.1, 0.2)   |
| Flavored use/Current use                              |                                                      |                |              |              | 35.7           | (29.6, 42.3) |                                                                              | 36.6           | (28.1, 46.1) |                   | 35.4           | (27.7, 44.0) |

**Appendix**  
**Flavored Tobacco Product Use in Youth and Adults: Findings From the First Wave of the PATH Study (2013–2014)**  
**Villanti et al.**

|                               |     |      |              |       |      |              |     |      |              |       |      |              |
|-------------------------------|-----|------|--------------|-------|------|--------------|-----|------|--------------|-------|------|--------------|
| Hookah tobacco                | 226 | 1.7  | (1.4, 2.0)   | 1,097 | 1.4  | (1.3, 1.5)   | 813 | 6.9  | (6.3, 7.6)   | 284   | 0.6  | (0.5, 0.7)   |
| Flavored hookah tobacco       | 198 | 1.5  | (1.2, 1.8)   | 831   | 1.0  | (0.9, 1.2)   | 625 | 5.3  | (4.6, 6.1)   | 206   | 0.4  | (0.3, 0.5)   |
| Flavored use/Current use      |     | 89.0 | (84.1, 92.5) |       | 74.1 | (71.0, 77.0) |     | 77.1 | (73.9, 80.0) |       | 68.7 | (62.3, 74.4) |
| Smokeless tobacco             | 180 | 1.4  | (1.2, 1.7)   | 1,597 | 2.7  | (2.5, 2.9)   | 451 | 3.7  | (3.3, 4.2)   | 1,146 | 2.5  | (2.3, 2.7)   |
| Flavored smokeless tobacco    | 146 | 1.1  | (1.0, 1.4)   | 839   | 1.4  | (1.2, 1.6)   | 275 | 2.3  | (1.8, 2.8)   | 564   | 1.2  | (1.0, 1.4)   |
| Flavored use/Current use      |     | 81.0 | (75.1, 85.7) |       | 51.1 | (47.4, 54.7) |     | 61.7 | (55.4, 67.6) |       | 48.7 | (44.9, 52.5) |
| Snus                          | 64  | 0.5  | (0.4, 0.6)   | 276   | 0.4  | (0.4, 0.5)   | 111 | 1.0  | (0.8, 1.2)   | 165   | 0.4  | (0.3, 0.4)   |
| Flavored snus                 | 54  | 0.4  | (0.3, 0.5)   | 228   | 0.3  | (0.3, 0.4)   | 94  | 0.8  | (0.6, 1.1)   | 134   | 0.3  | (0.2, 0.4)   |
| Flavored use/Current use      |     | 80.4 | (68.6, 88.6) |       | 80.8 | (75.7, 85.1) |     | 83.0 | (73.4, 89.5) |       | 79.9 | (73.2, 85.3) |
| Dissolvable tobacco*          | -   | -    | -            | -     | -    | -            | -   | -    | -            | -     | -    | -            |
| Flavored dissolvable tobacco* | -   | -    | -            | -     | -    | -            | -   | -    | -            | -     | -    | -            |
| Flavored use/Current use      |     |      |              |       |      |              |     |      |              |       |      |              |
| Bidis                         | -   | -    | -            |       | N/A  | N/A          |     | N/A  | N/A          |       | N/A  | N/A          |
| Flavored bidis                | -   | -    | -            |       | N/A  | N/A          |     | N/A  | N/A          |       | N/A  | N/A          |
| Flavored use/Current use      |     |      |              |       |      |              |     |      |              |       |      |              |
| Kreteks                       | -   | -    | -            |       | N/A  | N/A          |     | N/A  | N/A          |       | N/A  | N/A          |
| Flavored kreteks              | -   | -    | -            |       | N/A  | N/A          |     | N/A  | N/A          |       | N/A  | N/A          |
| Flavored use/Current use      |     |      |              |       |      |              |     |      |              |       |      |              |

*Notes:* - Suppressed due to  $n < 50$  or coefficient of variation  $> 30\%$ .

<sup>a</sup>Percentages are weighted to represent the U.S. population and CIs are estimated using the balanced repeated replication (BRR) method.

<sup>b</sup>For youth, current use is defined as past 30-day use. Individuals who reported “don’t know” or refused to answer any part of the definition of current use were excluded from the denominator.

<sup>c</sup>For adults, current use some days or every day and either (1): 100 lifetime units (for cigarettes); (2): or weekly or monthly use and ever fairly regular use (for hookah); (3): ever fairly regular use (for all other products). Individuals who reported “don’t know” or refused to answer any part of the definition of current use were excluded from the denominator. Adult respondents with missing ages (N=7) were excluded from Table 1.

<sup>d</sup>Column percentages presented.

<sup>e</sup>Any current tobacco use is defined as reporting current use of any tobacco product using the “current use” definitions outlined in footnotes b and c above.

<sup>f</sup>Exclusive cigarette use is defined as current use of cigarettes and no current use of other tobacco products.

<sup>g</sup>Exclusive non-cigarette tobacco use is defined as no current use of cigarettes and current use of any other tobacco product.

<sup>h</sup>Poly use of cigarettes and other tobacco is defined as current use of cigarettes and at least one other tobacco product.

<sup>i</sup>Manufactured cigarette or roll-your-own.

<sup>j</sup>Respondents who indicated current use of a cigar were asked about use of traditional cigars, cigarillos, and filtered cigars separately. Respondents indicating use of two or more types of cigars (traditional, cigarillo, or filtered cigars) were asked about flavor use of each type of cigar separately. Any respondent who reported currently using 2 or more types of cigars had their responses aggregated, so that

**Appendix**  
**Flavored Tobacco Product Use in Youth and Adults: Findings From the First Wave of the PATH Study (2013–2014)**  
**Villanti et al.**

if any of the current traditional, cigarillo, or filtered cigars they use are flavored, they were included in the estimate of current cigar users reporting current flavored use.

N/A, not applicable

**Appendix**  
**Flavored Tobacco Product Use in Youth and Adults: Findings From the First Wave of the PATH Study (2013–2014)**  
**Villanti et al.**

**Appendix Table 2.** Current Product-specific Use and Current Flavored Use in the Full Adult Sample by Age Group; Population Assessment of Tobacco and Health, 2013-2014<sup>a</sup>

| Current tobacco use                      | Adult sample (unweighted N=32,313; Missing=7) <sup>b</sup> |              |                            |              |                           |              |                           |              |                            |              |                            |              |                          |             |
|------------------------------------------|------------------------------------------------------------|--------------|----------------------------|--------------|---------------------------|--------------|---------------------------|--------------|----------------------------|--------------|----------------------------|--------------|--------------------------|-------------|
|                                          | Overall                                                    |              | 18-24<br>(13.0% of sample) |              | 25-29<br>(8.7% of sample) |              | 30-34<br>(9.0% of sample) |              | 35-44<br>(16.5% of sample) |              | 45-64<br>(34.5% of sample) |              | 65+<br>(18.2% of sample) |             |
|                                          | %                                                          | 95% CI       | %                          | 95% CI       | %                         | 95% CI       | %                         | 95% CI       | %                          | 95% CI       | %                          | 95% CI       | %                        | 95% CI      |
| Any current tobacco use <sup>c</sup>     | 23.0                                                       | (22.4, 23.6) | 28.8                       | (27.5, 30.2) | 32.8                      | (30.9, 34.7) | 28.8                      | (27.2, 30.6) | 25.7                       | (24.4, 27.0) | 22.3                       | (21.4, 23.1) | 10.0                     | (9.3, 10.8) |
| Any flavored tobacco use                 | 11.4                                                       | (10.8, 11.9) | 20.9                       | (19.4, 22.5) | 20.8                      | (18.7, 22.9) | 16.1                      | (14.4, 18.0) | 11.3                       | (10.2, 12.5) | 8.6                        | (7.9, 9.3)   | 2.8                      | (2.4, 3.4)  |
| Exclusive cigarette use                  | 14.2                                                       | (13.7, 14.7) | 11.7                       | (11.0, 12.6) | 18.6                      | (17.3, 20.0) | 18.0                      | (16.7, 19.5) | 16.4                       | (15.4, 17.5) | 15.8                       | (15.1, 16.6) | 6.8                      | (6.2, 7.5)  |
| Mentholated cigarettes                   | 5.6                                                        | (5.2, 6.0)   | 6.9                        | (6.1, 7.8)   | 10.0                      | (8.7, 11.5)  | 8.1                       | (6.9, 9.4)   | 5.7                        | (5.0, 6.5)   | 5.3                        | (4.8, 5.9)   | 1.8                      | (1.4, 2.2)  |
| Exclusive non-cigarette tobacco use      | 4.8                                                        | (4.5, 5.0)   | 9.1                        | (8.4, 9.9)   | 6.3                       | (5.5, 7.2)   | 5.5                       | (4.9, 6.2)   | 4.6                        | (4.1, 5.2)   | 3.8                        | (3.5, 4.2)   | 2.4                      | (2.1, 2.7)  |
| Any flavored tobacco use                 | 2.8                                                        | (2.6, 3.0)   | 7.1                        | (6.3, 8.0)   | 4.2                       | (3.3, 5.2)   | 4.0                       | (3.2, 4.8)   | 2.4                        | (1.9, 3.0)   | 1.7                        | (1.5, 2.1)   | 0.8                      | (0.5, 1.1)  |
| Poly use of cigarettes and other tobacco | 4.0                                                        | (3.8, 4.2)   | 7.9                        | (7.3, 8.6)   | 7.9                       | (7.0, 8.9)   | 5.3                       | (4.7, 6.0)   | 4.7                        | (4.2, 5.3)   | 2.6                        | (2.4, 2.9)   | 0.8                      | (0.6, 1.0)  |
| Any flavored tobacco use                 | 2.9                                                        | (2.7, 3.2)   | 6.9                        | (6.1, 7.7)   | 6.5                       | (5.4, 7.7)   | 4.1                       | (3.4, 4.9)   | 3.3                        | (2.7, 4.0)   | 1.5                        | (1.2, 1.8)   | 0.3                      | (0.2, 0.6)  |
| Cigarettes <sup>d</sup>                  | 18.2                                                       | (17.7, 18.7) | 19.6                       | (18.4, 20.8) | 26.4                      | (24.9, 28.1) | 23.3                      | (21.7, 24.9) | 21.1                       | (19.9, 22.3) | 18.4                       | (17.7, 19.2) | 7.6                      | (7.0, 8.3)  |
| Mentholated cigarettes <sup>d</sup>      | 6.8                                                        | (6.3, 7.2)   | 9.2                        | (8.1, 10.3)  | 12.4                      | (10.9, 14.0) | 10.0                      | (8.6, 11.5)  | 7.0                        | (6.1, 8.0)   | 6.0                        | (5.4, 6.6)   | 1.9                      | (1.5, 2.4)  |
| E-cigarettes                             | 2.4                                                        | (2.2, 2.6)   | 3.8                        | (3.4, 4.3)   | 3.8                       | (3.3, 4.4)   | 3.8                       | (3.2, 4.6)   | 2.7                        | (2.3, 3.2)   | 1.9                        | (1.7, 2.1)   | 0.7                      | (0.5, 1.0)  |
| Flavored e-cigarettes                    | 1.6                                                        | (1.4, 1.8)   | 3.2                        | (2.7, 3.7)   | 2.9                       | (2.3, 3.6)   | 2.9                       | (2.2, 3.7)   | 1.6                        | (1.2, 2.0)   | 1.1                        | (0.8, 1.3)   | -                        | -           |
| Any cigar <sup>e</sup>                   | 3.1                                                        | (2.9, 3.2)   | 6.0                        | (5.5, 6.6)   | 4.8                       | (4.0, 5.7)   | 3.6                       | (3.1, 4.2)   | 3.3                        | (2.9, 3.8)   | 2.4                        | (2.2, 2.6)   | 1.0                      | (0.8, 1.3)  |
| Any flavored cigars                      | 1.6                                                        | (1.4, 1.8)   | 3.9                        | (3.3, 4.6)   | 2.7                       | (2.0, 3.6)   | 2.0                       | (1.4, 2.6)   | 1.7                        | (1.3, 2.1)   | 1.1                        | (0.9, 1.3)   | -                        | -           |
| Traditional cigars                       | 1.5                                                        | (1.4, 1.6)   | 2.2                        | (1.9, 2.5)   | 2.2                       | (1.7, 2.7)   | 1.9                       | (1.6, 2.3)   | 1.6                        | (1.4, 2.0)   | 1.3                        | (1.1, 1.5)   | 0.6                      | (0.4, 0.8)  |
| Flavored traditional cigars              | 0.5                                                        | (0.4, 0.6)   | 1.0                        | (0.7, 1.3)   | 0.8                       | (0.5, 1.2)   | 0.8                       | (0.5, 1.2)   | 0.5                        | (0.3, 0.8)   | 0.4                        | (0.2, 0.5)   | 0.1                      | (0.0, 0.2)  |
| Cigarillos                               | 1.6                                                        | (1.5, 1.7)   | 4.4                        | (4.0, 4.9)   | 3.1                       | (2.5, 3.8)   | 2.1                       | (1.7, 2.6)   | 1.5                        | (1.2, 1.8)   | 0.8                        | (0.7, 1.0)   | -                        | -           |
| Flavored cigarillos                      | 1.0                                                        | (0.8, 1.1)   | 3.0                        | (2.5, 3.5)   | 1.8                       | (1.3, 2.5)   | 1.3                       | (0.9, 1.8)   | 0.8                        | (0.6, 1.2)   | 0.4                        | (0.3, 0.6)   | -                        | -           |
| Filtered cigars                          | 0.9                                                        | (0.8, 0.9)   | 1.2                        | (0.9, 1.5)   | -                         | -            | -                         | -            | 0.9                        | (0.7, 1.2)   | 1.0                        | (0.9, 1.2)   | -                        | -           |
| Flavored filtered cigars                 | 0.5                                                        | (0.4, 0.6)   | 1.0                        | (0.6, 1.3)   | -                         | -            | -                         | -            | 0.5                        | (0.4, 0.9)   | 0.5                        | (0.4, 0.7)   | -                        | -           |
| Pipe tobacco                             | 0.5                                                        | (0.4, 0.6)   | 0.8                        | (0.7, 1.0)   | -                         | -            | -                         | -            | -                          | -            | 0.4                        | (0.3, 0.5)   | -                        | -           |
| Flavored pipe tobacco                    | 0.2                                                        | (0.1, 0.2)   | 0.3                        | (0.2, 0.5)   | -                         | -            | -                         | -            | -                          | -            | -                          | -            | -                        | -           |
| Hookah tobacco                           | 1.4                                                        | (1.3, 1.5)   | 6.9                        | (6.3, 7.6)   | 3.4                       | (2.8, 4.0)   | 1.0                       | (0.8, 1.4)   | -                          | -            | -                          | -            | -                        | -           |
| Flavored hookah tobacco                  | 1.0                                                        | (0.9, 1.2)   | 5.3                        | (4.6, 6.1)   | 2.3                       | (2.0, 2.1)   | -                         | -            | -                          | -            | -                          | -            | -                        | -           |
| Smokeless tobacco                        | 2.7                                                        | (2.5, 2.9)   | 3.7                        | (3.3, 4.2)   | 3.9                       | (3.3, 4.7)   | 3.3                       | (2.8, 3.8)   | 3.5                        | (3.0, 4.0)   | 2.1                        | (1.8, 2.4)   | 1.3                      | (1.1, 1.5)  |
| Flavored smokeless tobacco               | 1.4                                                        | (1.2, 1.6)   | 2.3                        | (1.8, 2.8)   | 2.3                       | (1.7, 3.1)   | 2.0                       | (1.4, 2.7)   | 1.8                        | (1.3, 2.3)   | 0.9                        | (0.7, 1.1)   | 0.4                      | (0.3, 0.7)  |
| Snus                                     | 0.4                                                        | (0.4, 0.5)   | 1.0                        | (0.8, 1.2)   | -                         | -            | -                         | -            | 0.6                        | (0.5, 0.8)   | 0.2                        | (0.2, 0.3)   | -                        | -           |
| Flavored snus                            | 0.3                                                        | (0.3, 0.4)   | 0.8                        | (0.6, 1.1)   | -                         | -            | -                         | -            | -                          | -            | 0.1                        | (0.1, 0.2)   | -                        | -           |
| Dissolvable tobacco*                     | -                                                          | -            | -                          | -            | -                         | -            | -                         | -            | -                          | -            | -                          | -            | -                        | -           |

**Appendix**  
**Flavored Tobacco Product Use in Youth and Adults: Findings From the First Wave of the PATH Study (2013–2014)**  
**Villanti et al.**

Flavored dissolvable  
tobacco\*

*Notes:* - Suppressed due to  $n < 50$  or coefficient of variation  $> 30\%$ .

<sup>a</sup>Percentages are weighted to represent the U.S. adult population and CIs are estimated using the balanced repeated replication (BRR) method.

<sup>b</sup>For adults, current use some days or every day and either (1): 100 lifetime units (for cigarettes); (2): or weekly or monthly use and ever fairly regular use (for hookah); (3): ever fairly regular use (for all other products). Individuals who reported “don’t know” or refused to answer any part of the definition of current use were included in the denominator, but not classified as current users.

<sup>c</sup>Column percentages presented.

<sup>d</sup>Manufactured cigarette or roll-your-own.

<sup>e</sup>Respondents who indicated current use of a cigar were asked about use of traditional cigars, cigarillos, and filtered cigars separately. Respondents indicating use of two or more types of cigars (traditional, cigarillo, or filtered cigars) were asked about flavor use of each type of cigar separately. Any respondent who reported currently using two or more types of cigars had their responses aggregated, so that if any of the current traditional, cigarillo, or filtered cigars they use are flavored, they were included in the estimate of current cigar users reporting current flavored use.

**Appendix**  
**Flavored Tobacco Product Use in Youth and Adults: Findings From the First Wave of the PATH Study (2013–2014)**  
**Villanti et al.**

**Appendix Table 3.** Reasons for Product Use by Product and Age Group (12-17, 18-24, 25+) Among Current Tobacco Users<sup>a</sup>; Population Assessment of Tobacco and Health, 2013-2014

| <b>Product<sup>b,c</sup></b> | <b>Youth (ages 12-17)</b>                                                                                                                                                                                                             | <b>Young adults (ages 18-24)</b>                                                                                                                                                                                                         | <b>Adults (ages 25+)</b>                                                                                                                                                                                     |
|------------------------------|---------------------------------------------------------------------------------------------------------------------------------------------------------------------------------------------------------------------------------------|------------------------------------------------------------------------------------------------------------------------------------------------------------------------------------------------------------------------------------------|--------------------------------------------------------------------------------------------------------------------------------------------------------------------------------------------------------------|
| Cigars                       | N=92<br>1. I like socializing while using them (67%)<br><b>2. Comes in flavors I like (65%)</b><br>3. Affordability (52%)<br>4. Less harmful to me than cigs (43%)<br>5. People in the media use them (39%)                           | N=258<br>1. I like socializing while using them (77%)<br><b>2. Comes in flavors I like (73%)</b><br>3. Affordability (47%)<br>4. Less harmful to me than cigs (27%)<br>5. People who are important to me use them (25%)                  | N=632<br>1. I like socializing while using them (67%)<br><b>2. Comes in flavors I like (54%)</b><br>3. Affordability (45%)<br>4. Less harmful to me than cigs (29%)<br>5. Feels like smoking a cig (17%)     |
| Filtered cigars              | N=67<br><b>1. Comes in flavors I like (73%)</b><br>2. Affordability (60%)<br>3. I like socializing while using them (47%)<br>4. The product doesn't smell (41% <sup>^</sup> )<br><br>5. People who are important to me use them (33%) | N=146<br><b>1. Comes in flavors I like (82%)</b><br>2. Affordability (67%)<br>3. I like socializing while using them (62%)<br>4. Feels like smoking a cig (45%)<br><br>5. People who are important to me use them (23%)                  | N=405<br>1. Affordability (83%)<br><b>2. Comes in flavors I like (67%)</b><br>3. Feels like smoking a cig (54%)<br>4. I like socializing while using them (47%)<br>5. Less harmful to me than cigs (30%)     |
| Cigarillos                   | N=293<br><b>1. Comes in flavors I like (73%)</b><br>2. Affordability (58%)<br>3. I like socializing while using them (54%)<br>4. People in the media use them (27%)<br>5. People who are important to me use them (25%)               | N=586<br><b>1. Comes in flavors I like (74%)</b><br>2. Affordability (71%)<br>3. I like socializing while using them (63%)<br>4. Feels like smoking a cig (23% <sup>^</sup> )<br><br>5. Less harmful to me than cigs (23% <sup>^</sup> ) | N=600<br>1. Affordability (72%)<br><b>2. Comes in flavors I like (71%)</b><br>3. I like socializing while using them (59%)<br>4. Feels like smoking a cig (27%)<br><br>5. Less harmful to me than cigs (25%) |
| E-cigarettes                 | N=418                                                                                                                                                                                                                                 | N=467                                                                                                                                                                                                                                    | N=1,108                                                                                                                                                                                                      |

**Appendix**  
**Flavored Tobacco Product Use in Youth and Adults: Findings From the First Wave of the PATH Study (2013–2014)**  
**Villanti et al.**

|                   |                                                                                                                                                                                                                                                            |                                                                                                                                                                                                                                                    |                                                                                                                                                                                                                                                          |
|-------------------|------------------------------------------------------------------------------------------------------------------------------------------------------------------------------------------------------------------------------------------------------------|----------------------------------------------------------------------------------------------------------------------------------------------------------------------------------------------------------------------------------------------------|----------------------------------------------------------------------------------------------------------------------------------------------------------------------------------------------------------------------------------------------------------|
|                   | <p><b>1. Comes in flavors I like (81%)</b></p> <p>2. Less harmful to me than cigs (79%)</p> <p>3. Less harmful to other people than cigs (78%)</p> <p>4. Using them helps people quit smoking (60%)</p> <p>5. Can use where you can't smoke cigs (59%)</p> | <p>1. Less harmful to me than cigs (89%)</p> <p>2. Less harmful to other people than cigs (88%)</p> <p>3. Can use where you can't smoke cigs (86%)</p> <p><b>4. Comes in flavors I like (83%)</b></p> <p>5. The product doesn't smell (79%)</p>    | <p>1. Less harmful to me than cigs (90%^)</p> <p>2. Less harmful to other people than cigs (90%^)</p> <p>3. Can use where you can't smoke cigs (85%)</p> <p>4. Using them helps people quit smoking (83%)</p> <p>5. The product doesn't smell (83%^)</p> |
| Hookah            | <p>N=226</p> <p>1. I like socializing while using them (80%)</p> <p><b>2. Comes in flavors I like (79%)</b></p> <p>3. Less harmful to me than cigs (61%)</p> <p>4. Affordability (44%)</p> <p>5. People who are important to me use them (36%)</p>         | <p>N=813</p> <p>1. I like socializing while using them (95%)</p> <p><b>2. Comes in flavors I like (91%)</b></p> <p>3. Affordability (54%)</p> <p>4. Less harmful to me than cigs (45%)</p> <p>5. People who are important to me use them (34%)</p> | <p>N=284</p> <p>1. I like socializing while using them (91%)</p> <p><b>2. Comes in flavors I like (88%)</b></p> <p>3. Less harmful to me than cigs (56%)</p> <p>4. Affordability (49%)</p> <p>5. Can smoke where you can't smoke cigs (40%)</p>          |
| Pipe              | -                                                                                                                                                                                                                                                          | <p>N=101</p> <p><b>1. Comes in flavors I like (73%)</b></p> <p>2. I like socializing while using them (66%)</p> <p>3. Affordability (64%)</p> <p>4. Less harmful to me than cigs (32%)</p> <p>5. People who are important to me use them (26%)</p> | <p>N=217</p> <p><b>1. Comes in flavors I like (76%)</b></p> <p>2. Affordability (64%)</p> <p>3. I like socializing while using them (49%)</p> <p>4. Less harmful to me than cigs (38%)</p> <p>5. Using them helps people quit smoking (24%)</p>          |
| Smokeless tobacco | N=180                                                                                                                                                                                                                                                      | N=451                                                                                                                                                                                                                                              | N=1,146                                                                                                                                                                                                                                                  |

**Appendix**  
**Flavored Tobacco Product Use in Youth and Adults: Findings From the First Wave of the PATH Study (2013–2014)**  
**Villanti et al.**

|      |                                                                                                                                                                                                                                                          |                                                                                                                                                                                                                                  |                                                                                                                                                                                                                             |
|------|----------------------------------------------------------------------------------------------------------------------------------------------------------------------------------------------------------------------------------------------------------|----------------------------------------------------------------------------------------------------------------------------------------------------------------------------------------------------------------------------------|-----------------------------------------------------------------------------------------------------------------------------------------------------------------------------------------------------------------------------|
|      | 1. Can use where you can't smoke<br>cigs (70%)<br><b>2. Comes in flavors I like (69%)</b><br>3. Less harmful to other people than<br>cigs (68%)<br>4. Affordability (61%)<br><br>5. Less harmful to me than cigs<br>(51%)                                | 1. Can use where you can't smoke<br>cigs (84%)<br><b>2. Comes in flavors I like (75%)</b><br>3. Affordability (63%)<br><br>4. Less harmful to other people than<br>cigs (58%)<br>5. It doesn't bother non-tobacco<br>users (34%) | 1. Can use where you can't smoke<br>cigs (77%)<br><b>2. Comes in flavors I like (65%)</b><br>3. Less harmful to other people than<br>cigs (62%)<br>4. Affordability (47%)<br><br>5. The product doesn't smell (40%)         |
| Snus | N=64                                                                                                                                                                                                                                                     | N=111                                                                                                                                                                                                                            | N=165                                                                                                                                                                                                                       |
|      | 1. No one can tell when I am using it<br>(72%)<br>2. Can use where you can't smoke<br>cigs (71%)<br><b>3. Comes in flavors I like (67%)</b><br><br>4. Less harmful to other people than<br>cigs (51%)<br>5. It doesn't bother non-tobacco<br>users (50%) | <b>1. Comes in flavors I like (86%)</b><br>2. Can use where you can't smoke<br>cigs (85%)<br>3. No one can tell when I am using it<br>(68%)<br>4. Less harmful to other people than<br>cigs (66%)<br>5. Affordability (63%)      | 1. Can use where you can't smoke<br>cigs (84%)<br><b>2. Comes in flavors I like (82%)</b><br>3. No one can tell when I am using<br>it (66%)<br>4. Less harmful to other people than<br>cigs (56%)<br>5. Affordability (53%) |

- Suppressed due to n<50 or coefficient of variation >30%.

^Denotes ties in reasons used within a product and age group.

<sup>a</sup>Sample sizes reflected unweighted number of product users; Percentages are weighted to represent the U.S. adult population and CIs are estimated using the balanced repeated replication (BRR) method.

<sup>b</sup>Reasons for use were not assessed among current cigarette smokers.

<sup>c</sup>Reasons for use of bidis, kreteks, and dissolvable tobacco products not reported due to low sample size (<50).



**Appendix**  
**Flavored Tobacco Product Use in Youth and Adults: Findings From the First Wave of the PATH Study (2013–2014)**  
**Villanti et al.**

**Appendix Table 4.** Reasons for Flavored Tobacco Use and Association of Reason With Current Flavored Tobacco Product Use Among Current Tobacco Users, by Product and Age Group; Population Assessment of Tobacco and Health, 2013-2014<sup>a</sup>

| “Product comes in flavors that I like” <sup>d</sup> | Age 12-17 <sup>b</sup> |              |                                              |                     | Age 18-24 <sup>c</sup> |                |                                              |                     | Age 25 and older <sup>c</sup> |                |                                              |                     |
|-----------------------------------------------------|------------------------|--------------|----------------------------------------------|---------------------|------------------------|----------------|----------------------------------------------|---------------------|-------------------------------|----------------|----------------------------------------------|---------------------|
|                                                     | Total                  | 95% CI       | Current flavored product-specific use vs. no |                     | Total                  | 95% CI         | Current flavored product-specific use vs. no |                     | Total                         | 95% CI         | Current flavored product-specific use vs. no |                     |
|                                                     | (%) <sup>e</sup>       | (%)          | APR <sup>f</sup>                             | (95% CI)            | (%) <sup>e</sup>       | (%)            | APR <sup>g</sup>                             | (95% CI)            | (%) <sup>e</sup>              | (%)            | APR <sup>g</sup>                             | (95% CI)            |
| Overall                                             | 79.2                   | (76.4, 81.7) | <b>1.43</b>                                  | <b>(1.26, 1.62)</b> | 88.6                   | (86.93, 90.24) | <b>1.67</b>                                  | <b>(1.43, 1.95)</b> | 71.2                          | (69.45, 73.05) | <b>2.60</b>                                  | <b>(2.33, 2.90)</b> |
| E-cigarette                                         | 81.5                   | (77.6, 84.8) | <b>1.35</b>                                  | <b>(1.11, 1.64)</b> | 82.6                   | (78.41, 86.26) | <b>1.56</b>                                  | <b>(1.19, 2.04)</b> | 68.6                          | (65.78, 71.32) | <b>2.12</b>                                  | <b>(1.76, 2.55)</b> |
| Pipe                                                | -                      | -            | -                                            | -                   | 73.2                   | (59.97, 83.32) | 1.98                                         | (0.74, 5.28)        | 75.9                          | (69.05, 81.65) | <b>2.25</b>                                  | <b>(1.05, 4.83)</b> |
| Hookah                                              | 78.8                   | (72.9, 83.7) | <b>1.32</b>                                  | <b>(1.10, 1.59)</b> | 91.1                   | (88.66, 93.13) | <b>1.38</b>                                  | <b>(1.07, 1.78)</b> | 87.7                          | (82.66, 91.51) | <b>3.29</b>                                  | <b>(1.62, 6.69)</b> |
| Any cigar                                           | 73.8                   | (67.9, 79.0) | <b>1.97</b>                                  | <b>(1.47, 2.65)</b> | 76.1                   | (72.70, 79.34) | <b>2.00</b>                                  | <b>(1.57, 2.56)</b> | 65.8                          | (62.72, 68.82) | <b>3.48</b>                                  | <b>(2.74, 4.41)</b> |
| Cigar                                               | 65.1                   | (54.7, 74.2) | 2.13                                         | (0.84, 5.39)        | 72.9                   | (66.45, 78.51) | <b>2.52</b>                                  | <b>(1.44, 4.42)</b> | 54.4                          | (50.06, 58.67) | <b>4.18</b>                                  | <b>(2.57, 6.83)</b> |
| Cigarillo                                           | 73.2                   | (67.2, 78.5) | <b>1.62</b>                                  | <b>(1.27, 2.07)</b> | 73.9                   | (69.95, 77.61) | <b>1.82</b>                                  | <b>(1.43, 2.32)</b> | 70.7                          | (66.50, 74.66) | <b>2.86</b>                                  | <b>(2.23, 3.68)</b> |
| Filtered cigar                                      | 73.4                   | (62.6, 82.0) | <b>2.00</b>                                  | <b>(1.05, 3.80)</b> | 82.1                   | (73.06, 88.61) | 1.52                                         | (0.95, 2.45)        | 67.4                          | (63.02, 71.55) | <b>3.60</b>                                  | <b>(2.38, 5.44)</b> |
| Snus                                                | 67.2                   | (54.9, 77.4) | <b>1.96</b>                                  | <b>(1.19, 3.21)</b> | 85.5                   | (78.00, 90.86) | 1.26                                         | (0.77, 2.07)        | 82.1                          | (75.14, 87.49) | <b>1.52</b>                                  | <b>(1.05, 2.20)</b> |
| Smokeless                                           | 69.3                   | (62.3, 75.6) | <b>1.3</b>                                   | <b>(1.04, 1.63)</b> | 74.7                   | (70.45, 78.61) | <b>1.53</b>                                  | <b>(1.24, 1.90)</b> | 64.6                          | (61.66, 67.60) | <b>2.10</b>                                  | <b>(1.76, 2.50)</b> |
| Dissolvable tobacco                                 | -                      | -            | -                                            | -                   | -                      | -              | -                                            | -                   | -                             | -              | -                                            | -                   |
| Bidis                                               | -                      | -            | -                                            | -                   | N/A                    | N/A            | N/A                                          | N/A                 | N/A                           | N/A            | N/A                                          | N/A                 |
| Kreteks                                             | -                      | -            | -                                            | -                   | N/A                    | N/A            | N/A                                          | N/A                 | N/A                           | N/A            | N/A                                          | N/A                 |

**Appendix**  
**Flavored Tobacco Product Use in Youth and Adults: Findings From the First Wave of the PATH Study (2013–2014)**  
**Villanti et al.**

| Flavored product easier to use than unflavored product <sup>b</sup> | Total               | 95% CI       | Current flavored product-specific use vs. no use vs. no |                     |
|---------------------------------------------------------------------|---------------------|--------------|---------------------------------------------------------|---------------------|
|                                                                     | (%)<br><sub>e</sub> | (%)          | APR<br><sub>f</sub>                                     | (95% CI)            |
| Overall                                                             | 72.8                | (70.3, 75.2) | <b>1.09</b>                                             | <b>(1.00, 1.19)</b> |
| Cigarette                                                           | 27.4                | (24.2, 30.8) | <b>1.27</b>                                             | <b>(1.11, 1.44)</b> |
| E-cigarette                                                         | 54.8                | (49.5, 60.0) | <b>1.13</b>                                             | <b>(1.03, 1.23)</b> |
| Pipe                                                                | -                   | -            | -                                                       | -                   |
| Hookah                                                              | 56.1                | (49.2, 62.7) | 1.03                                                    | (0.93, 1.14)        |
| Any cigar                                                           | 39.9                | (34.2, 46.0) | <b>1.32</b>                                             | <b>(1.15, 1.51)</b> |
| Cigar                                                               | 29.3                | (19.3, 41.7) | 1.09                                                    | (0.64, 1.86)        |
| Cigarillo                                                           | 35.1                | (29.3, 41.4) | <b>1.31</b>                                             | <b>(1.14, 1.50)</b> |
| Filtered cigar                                                      | 38.5                | (27.2, 51.3) | <b>1.36</b>                                             | <b>(1.00, 1.84)</b> |
| Smokeless                                                           | 45.1                | (38.6, 51.7) | 1.03                                                    | (0.89, 1.20)        |
| Dissolvable tobacco                                                 | -                   | -            | -                                                       | -                   |
| Bidis                                                               | -                   | -            | -                                                       | -                   |
| Kreteks                                                             | -                   | -            | -                                                       | -                   |

- Suppressed due to n<50 or coefficient of variation >30%.

<sup>a</sup>Percentages are weighted to represent the U.S. population and CIs are estimated using the balanced repeated replication (BRR) method.

<sup>b</sup>For youth, current use is defined as past 30-day use. Individuals who reported “don’t know” or refused to answer any part of the definition of current use were excluded from the denominator.

**Appendix**  
**Flavored Tobacco Product Use in Youth and Adults: Findings From the First Wave of the PATH Study (2013–2014)**  
**Villanti et al.**

<sup>c</sup>For adults, current use some days or every day and either (1): 100 lifetime units (for cigarettes); (2): or weekly or monthly use and ever fairly regular use (for hookah); (3): ever fairly regular use (for all other products). Individuals who reported “don’t know” or refused to answer any part of the definition of current use were excluded from the denominator.

<sup>d</sup>Cigarettes were not included in the “product comes in flavors that I like” question.

<sup>e</sup>Percentage of current users that endorse reason for use.

<sup>f</sup>For youth: aPR for current flavored pipe use adjusted for gender and Hispanic ethnicity; aPR for current flavored cigar use adjusted for gender, Hispanic ethnicity, and education; aPRs for current flavored bidi use (n=6) and current flavored kretek use (n=10) did not adjust for any demographics; aPR for all other products adjusted for gender, race, Hispanic ethnicity, and education.

<sup>g</sup>For adult: aPR for current flavored pipe use among age 25+ sample adjusted for gender, Hispanic ethnicity, and income; aPR for current flavored any cigar use and cigar use adjusted for gender and Hispanic ethnicity; aPR for all other products adjusted for gender, race, Hispanic ethnicity, income, and education.

<sup>h</sup>Snus was not included in the “flavored product easier to use than unflavored” question.

APR, adjusted prevalence ratio; N/A not applicable

**Appendix**  
**Flavored Tobacco Product Use in Youth and Adults: Findings From the First Wave of the PATH Study (2013–2014)**  
**Villanti et al.**

**Appendix Table 5.** Adjusted Prevalence Ratios for Current Flavored Use Among Current Adult Tobacco Users, by Use Group; Population Assessment of Tobacco and Health, 2013-2014<sup>a</sup>

| Correlates                       | Exclusive cigarette smokers <sup>b</sup> (62%) |                     | Exclusive non-cigarette tobacco users (21%) |                     | Poly users of cigarettes and other tobacco (17%) |                     |
|----------------------------------|------------------------------------------------|---------------------|---------------------------------------------|---------------------|--------------------------------------------------|---------------------|
|                                  | Unweighted N=7,542                             |                     | Unweighted N=2,585                          |                     | Unweighted N=2,436                               |                     |
|                                  | APR                                            | 95% CI              | APR                                         | 95% CI              | APR                                              | 95% CI              |
| <b>Age</b>                       |                                                |                     |                                             |                     |                                                  |                     |
| 18-24                            | <b>1.30</b>                                    | <b>(1.21, 1.39)</b> | <b>1.11</b>                                 | <b>(1.04, 1.19)</b> | <b>1.14</b>                                      | <b>(1.08, 1.19)</b> |
| 25+                              | Ref                                            |                     | Ref                                         |                     | Ref                                              |                     |
| <b>Gender</b>                    |                                                |                     |                                             |                     |                                                  |                     |
| Male                             | Ref                                            |                     | Ref                                         |                     | Ref                                              |                     |
| Female                           | <b>1.14</b>                                    | <b>(1.08, 1.20)</b> | <b>1.27</b>                                 | <b>(1.19, 1.36)</b> | <b>1.09</b>                                      | <b>(1.02, 1.15)</b> |
| <b>Race</b>                      |                                                |                     |                                             |                     |                                                  |                     |
| White                            | Ref                                            |                     | Ref                                         |                     | Ref                                              |                     |
| Black/African American           | <b>2.17</b>                                    | <b>(2.03, 2.31)</b> | 1.06                                        | (0.97, 1.16)        | <b>1.23</b>                                      | <b>(1.16, 1.30)</b> |
| American Indian/Alaskan Native   | <b>1.41</b>                                    | <b>(1.19, 1.68)</b> | 0.89                                        | (0.67, 1.18)        | 1.08                                             | (0.90, 1.29)        |
| Asian                            | 1.08                                           | (0.85, 1.36)        | <b>1.20</b>                                 | <b>(1.01, 1.42)</b> | <b>1.21</b>                                      | <b>(1.01, 1.45)</b> |
| Native Hawaiian/Pacific Islander | <b>1.54</b>                                    | <b>(1.22, 1.96)</b> | 1.05                                        | (0.87, 1.28)        | 1.10                                             | (0.93, 1.30)        |
| 2+ races                         | <b>1.22</b>                                    | <b>(1.08, 1.38)</b> | 1.04                                        | (0.91, 1.19)        | 1.03                                             | (0.94, 1.12)        |
| <b>Hispanic</b>                  |                                                |                     |                                             |                     |                                                  |                     |
| No                               | Ref                                            |                     | Ref                                         |                     | Ref                                              |                     |
| Yes                              | <b>1.28</b>                                    | <b>(1.17, 1.39)</b> | <b>1.11</b>                                 | <b>(1.02, 1.21)</b> | <b>1.14</b>                                      | <b>(1.07, 1.21)</b> |
| <b>Education</b>                 |                                                |                     |                                             |                     |                                                  |                     |
| <HS                              | 1.09                                           | (0.94, 1.26)        | 1.01                                        | (0.87, 1.18)        | 0.96                                             | (0.86, 1.06)        |
| GED                              | 1.12                                           | (0.96, 1.30)        | 1.05                                        | (0.90, 1.23)        | 0.99                                             | (0.87, 1.11)        |
| HS diploma                       | <b>1.18</b>                                    | <b>(1.03, 1.35)</b> | 1.10                                        | (0.97, 1.25)        | 1.03                                             | (0.94, 1.13)        |
| Some college                     | <b>1.22</b>                                    | <b>(1.08, 1.37)</b> | 1.08                                        | (0.97, 1.21)        | 1.03                                             | (0.94, 1.13)        |

**Appendix**  
**Flavored Tobacco Product Use in Youth and Adults: Findings From the First Wave of the PATH Study (2013–2014)**  
**Villanti et al.**

|                                           |             |                     |             |                     |             |                     |
|-------------------------------------------|-------------|---------------------|-------------|---------------------|-------------|---------------------|
| College or greater                        | Ref         |                     | Ref         |                     | Ref         |                     |
| <b>Annual household income</b>            |             |                     |             |                     |             |                     |
| <\$15,000                                 | 1.08        | (1.00, 1.17)        | 0.98        | (0.89, 1.08)        | 0.93        | (0.87, 1.00)        |
| \$15,000 up to \$34,999                   | 1.07        | (0.98, 1.17)        | 0.94        | (0.84, 1.05)        | 0.98        | (0.91, 1.05)        |
| \$35,000 up to \$74,999                   | Ref         |                     | Ref         |                     | Ref         |                     |
| \$75,000+                                 | 0.96        | (0.86, 1.08)        | 0.87        | (0.79, 0.95)        | 0.95        | (0.86, 1.05)        |
| Number of tobacco products currently used | -           | -                   | <b>1.16</b> | <b>(1.11, 1.21)</b> | <b>1.09</b> | <b>(1.06, 1.12)</b> |
| <b>First tobacco use was flavored</b>     |             |                     |             |                     |             |                     |
| No                                        | Ref         |                     | Ref         |                     | Ref         |                     |
| Yes                                       | <b>2.10</b> | <b>(1.95, 2.28)</b> | <b>1.84</b> | <b>(1.69, 2.00)</b> | <b>1.44</b> | <b>(1.33, 1.55)</b> |
| <b>Age at tobacco trial</b>               |             |                     |             |                     |             |                     |
| <18                                       | Ref         |                     | Ref         |                     | Ref         |                     |
| 18-24                                     | 1.06        | (0.91, 1.24)        | 1.13        | (0.89, 1.45)        | 0.88        | (0.71, 1.09)        |
| 25+                                       | 1.04        | (0.89, 1.21)        | 1.13        | (0.87, 1.46)        | 0.90        | (0.72, 1.12)        |
| <b>Past 30-day alcohol use</b>            |             |                     |             |                     |             |                     |
| No                                        | Ref         |                     | Ref         |                     | Ref         |                     |
| Yes                                       | 1.04        | (0.98, 1.10)        | 1.01        | (0.94, 1.09)        | 0.97        | (0.92, 1.03)        |
| <b>Past 30-day marijuana use</b>          |             |                     |             |                     |             |                     |
| No                                        | Ref         |                     | Ref         |                     | Ref         |                     |
| Yes                                       | 1.00        | (0.93, 1.07)        | 0.97        | (0.90, 1.04)        | 1.02        | (0.97, 1.07)        |
| <b>Substance use scale</b>                |             |                     |             |                     |             |                     |
| Low                                       | Ref         |                     | Ref         |                     | Ref         |                     |
| Moderate                                  | 1.03        | (0.95, 1.11)        | 1.06        | (0.97, 1.15)        | 1.05        | (0.99, 1.12)        |
| High                                      | 1.07        | (0.97, 1.17)        | 0.99        | (0.90, 1.10)        | 1.01        | (0.94, 1.10)        |
| <b>Internalizing scale</b>                |             |                     |             |                     |             |                     |
| Low                                       | Ref         |                     | Ref         |                     | Ref         |                     |
| Moderate                                  | 1.00        | (0.94, 1.07)        | 1.01        | (0.92, 1.10)        | 1.02        | (0.95, 1.09)        |
| High                                      | 1.03        | (0.94, 1.12)        | 1.06        | (0.96, 1.18)        | 1.00        | (0.92, 1.08)        |

**Appendix**  
**Flavored Tobacco Product Use in Youth and Adults: Findings From the First Wave of the PATH Study (2013–2014)**  
**Villanti et al.**

| Externalizing scale |      |              |      |              |      |              |
|---------------------|------|--------------|------|--------------|------|--------------|
| Low                 | Ref  |              | Ref  |              | Ref  |              |
| Moderate            | 1.00 | (0.93, 1.08) | 1.05 | (0.97, 1.14) | 0.97 | (0.91, 1.04) |
| High                | 1.00 | (0.92, 1.09) | 1.05 | (0.97, 1.14) | 1.05 | (0.97, 1.13) |

*Notes:* Boldface indicates statistical significance ( $p < 0.05$ ). Respondents with missing outcome variables or missing covariates were excluded from the respective model's analytic sample. Missingness for exclusive cigarette smokers=Age (n=1; 0.0%), race (n=18; 0.2%), education (n=64; 0.8%), annual household income (n=772; 9.1%), age at tobacco trial (n=7; 0.1%), alcohol (n=10; 0.1%), marijuana (n=76; 0.9%), substance use scale (n=258; 3.1%), internalizing scale (n=116; 1.5%), and externalizing scale (n=205; 2.5%). Missingness for exclusive non-cigarette tobacco users=Race (n=6; 0.2%), education (n=21; 0.8%), annual household income (n=269; 9.0%), alcohol (n=5; 0.2%), marijuana (n=36; 1.2%), substance use scale (n=76; 2.8%), internalizing scale (n=35; 1.2%), and externalizing scale (n=57; 2.2%). Missingness for poly-tobacco users=Race (n=8; 0.2%), education (n=15; 0.5%), annual household income (n=175; 6.3%), alcohol (n=1; 0.0%), marijuana (n=34; 1.2%), substance use scale (n=61; 2.0%), internalizing scale (n=32; 1.3%), and externalizing scale (n=53; 2.1%).

<sup>a</sup>CIs are estimated using the balanced repeated replication (BRR) method.

<sup>b</sup>Prevalence ratios of current menthol cigarette use among exclusive cigarette smokers.

<sup>c</sup>Missing data on age, gender, race, and Hispanic ethnicity were logically assigned from household screener data, as described in the PATH Restricted Use File User's Guide.<sup>32</sup>

APR, adjusted prevalence ratio
